# Supplementary material for: Insights into dynamic structural evolution and its sodium storage mechanisms of P2/P3 composite cathode materials for sodium-ion batteries
Source: Royal Society of Chemistry journal article supplement (doi:10.1039/d4cc02166e), 2024-01-01
Supplement: d4cc02166e1.pdf [file d4cc02166e1.pdf]

## Electronic Supplementary Information

### Insights into dynamic structural evolution and its sodium storage mechanisms of P2/P3 composite cathode materials for sodium-ion batteries

Yi-Feng Liu,<sup>‡a</sup> Hai-Yan Hu,<sup>‡b, c</sup> Yan-Fang Zhu,<sup>\*b, c</sup> Dan-Ni Peng,<sup>a</sup> Jia-Yang Li,<sup>c</sup> Yan-Jiang Li,<sup>c</sup> Yu Su,<sup>c</sup> Rui-Ren Tang,<sup>\*a</sup> Shu-Lei Chou<sup>\*b, c</sup> and Yao Xiao<sup>\*b, c</sup>

<sup>a</sup> College of Chemistry and Chemical Engineering, Central South University, Changsha, Hunan 410083, China. Email: trr@csu.edu.cn

<sup>b</sup> College of Chemistry and Materials Engineering, Wenzhou University, Wenzhou, 325035, P.R. China

Email: yanfangzhu@wzu.edu.cn; chou@wzu.edu.cn; xiaoyao@wzu.edu.cn.

<sup>c</sup> Wenzhou Key Laboratory of Sodium-Ion Batteries, Wenzhou University Technology Innovation Institute for Carbon Neutralization, Wenzhou, 325035, P.R. China.

<sup>‡</sup> These authors contributed equally to this work.

## Experimental section

**Material synthesis.** The cathode materials  $\text{Na}_{0.44}\text{Mn}_{0.7}\text{Co}_{0.3}\text{O}_2$  (referred to as NaMC-0.3) and  $\text{Na}_{0.44}\text{Mn}_{0.5}\text{Co}_{0.5}\text{O}_2$  (NaMC-0.5) were synthesized via a method combining thermal polymerization with solid-state high-temperature steering. Initially, sodium acetate ( $\text{CH}_3\text{COONa}$ , Sigma-Aldrich, 99.00%), cobalt acetate ( $(\text{CoCH}_3\text{COO})_2 \cdot 4\text{H}_2\text{O}$ , Sigma-Aldrich, 99.90%), and manganese acetate ( $(\text{Mn}(\text{CH}_3\text{COO})_2 \cdot 4\text{H}_2\text{O})$ , Sigma-Aldrich, purity 99.99%) were dissolved in deionized water to create 0.4 M solution precursors. Stoichiometric amounts of acrylic acid (AA) and a specific quantity of nitric acid ( $\text{HNO}_3$ ) were added to the mixture, resulting in AA- $\text{H}_2\text{O}$  solutions with a 1:2 volume ratio. The solutions were heated at  $180^\circ\text{C}$  for 10 hours to promote the polymerization reaction, resulting in the formation of fluffy xerogels. The xerogels were ground for 10 minutes and then calcined at  $550^\circ\text{C}$  for 6 hours to remove organic components. Finally, the samples were sintered at  $900^\circ\text{C}$  for 12 hours to produce the final powder products.

**Material Characterizations.** X-ray diffraction (XRD) patterns were obtained using a D8 Advance Diffractometer (Bruker, Germany) equipped with a Cu  $K\alpha$  radiation source ( $\lambda_1 = 1.54056 \text{ \AA}$ ,  $\lambda_2 = 1.54439 \text{ \AA}$ ) over a  $2\theta$  range of  $10^\circ$ – $70^\circ$ . *In situ* XRD analysis was conducted using a specialized Swagelok cell with an aluminum foil window for X-rays. Morphological and structural characteristics were examined using field-emission scanning electron microscopy (SEM, SU-8020, Hitachi Limited, Japan).

**Electrochemical tests.** During half-cell assembly, the working electrode consisted of a homogeneous mixture comprising 70% active substance by weight, 20% Super P carbon, and 10% polyvinylidene difluoride (PVDF) binder, all mixed in N-methyl-2-pyrrolidone (NMP). The mixture was subsequently coated onto clean aluminium foil and dried under vacuum at  $80^\circ\text{C}$  overnight.

CR2032 coin cells were constructed within an argon-filled glove box, utilizing sodium foil and a porous glass fiber as the counter electrode and the separator, respectively. The selected electrolyte was a 1 M NaClO<sub>4</sub> solution in propylene carbonate (PC), supplemented with a 5% volume concentration of fluoroethylene carbonate (FEC) as an additive. Electrochemical assessments were performed using a Neware battery test system (CT-4008, Shenzhen, China) for battery analysis (1C = 120 mA g<sup>-1</sup> in 2.0-4.0 V and 1C = 200 mA g<sup>-1</sup> in 1.5-4.3 V). CV measurements were conducted using a Princeton instrument testing system. In the full-cell system, an anodic material was prepared from a blend of hard carbon, Super P carbon, and PVDF in a weight ratio of 8:1:1, and pre-sodiated via electrochemical methods (1C = 300 mA g<sup>-1</sup>). The balancing of the mass between the anode and cathode was adjusted based on their respective reversible capacities. Current density was calculated based on the cathode mass (1C = 120 mA g<sup>-1</sup>), with testing performed in the voltage range of 1.9–3.9 V at room temperature.

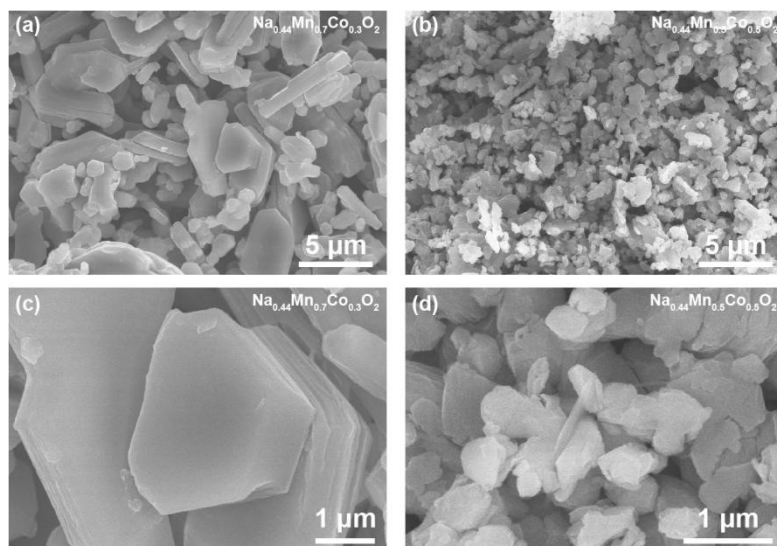

**Figure S1.** SEM images of (a, c) NaMC-0.3 and (b, d) NaMC-0.5 cathode materials at various magnifications.

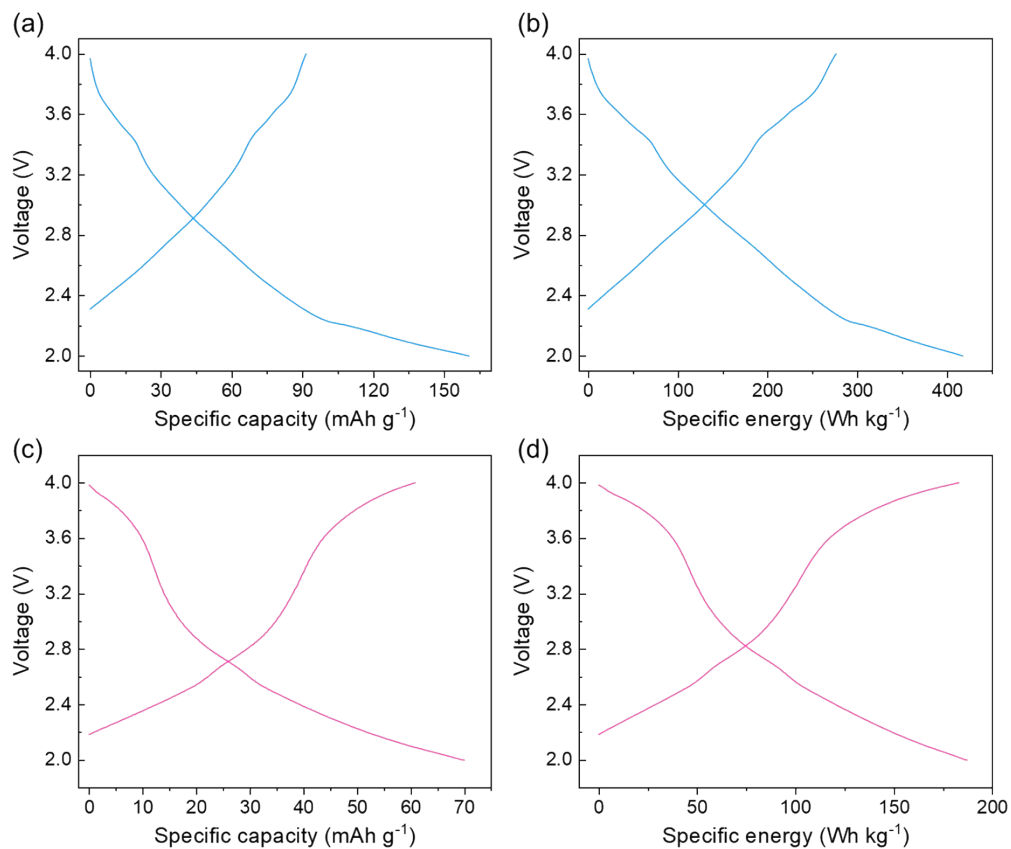

**Figure S2.** Initial galvanostatic charge/discharge curves for (a, b) NaMC-0.3 and (c, d) NaMC-0.5 electrodes in the voltage range of 2.0–4.0 V.

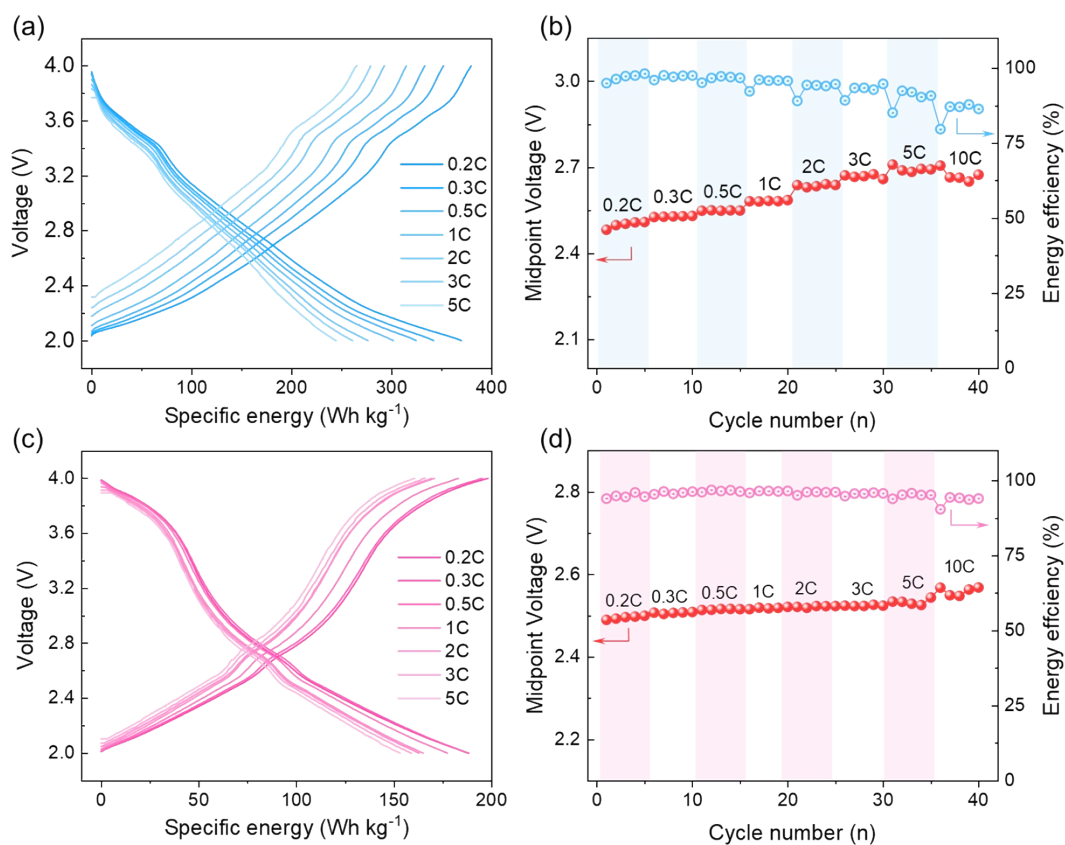

**Figure S3.** Rate performance for half-cell system: (a, c) Galvanostatic charge/discharge curves of NaMC-0.3 and NaMC-0.5 electrodes versus specific energy at various rates in the voltage range of 2.0–4.0 V, respectively. (b, d) Corresponding Midpoint voltage as well as energy efficiency of NaMC-0.3 and NaMC-0.5 electrodes, respectively.

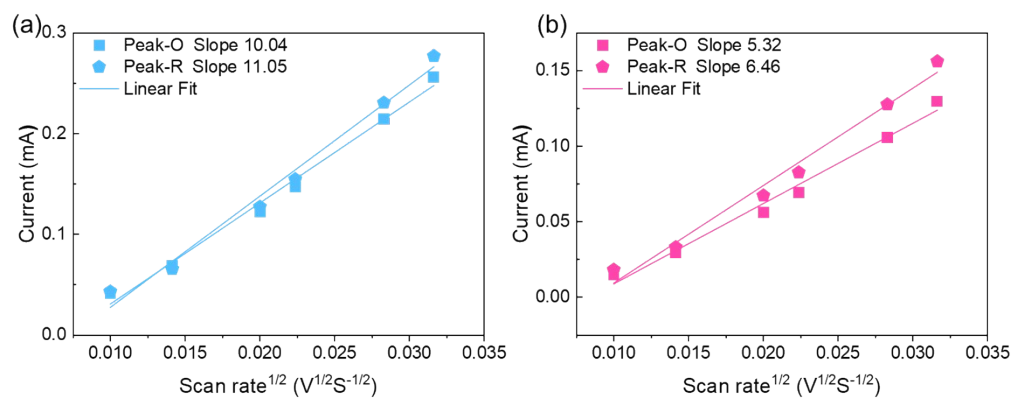

**Figure S4.** (a, b) Linear fitting of peak current versus square root of the scan rate of NaMC-0.3 and NaMC-0.5 electrodes, respectively.

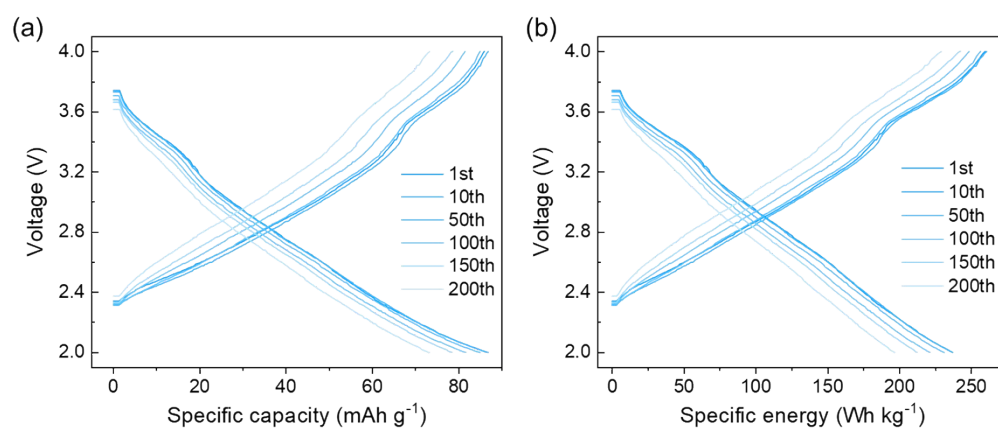

**Figure S5.** (a, b) Galvanostatic charge/discharge curves of NaMC-0.3 electrode versus specific capacity and energy in 1st, 10th, 50th, 100th, 150th, and 200th cycles at 5C, respectively.

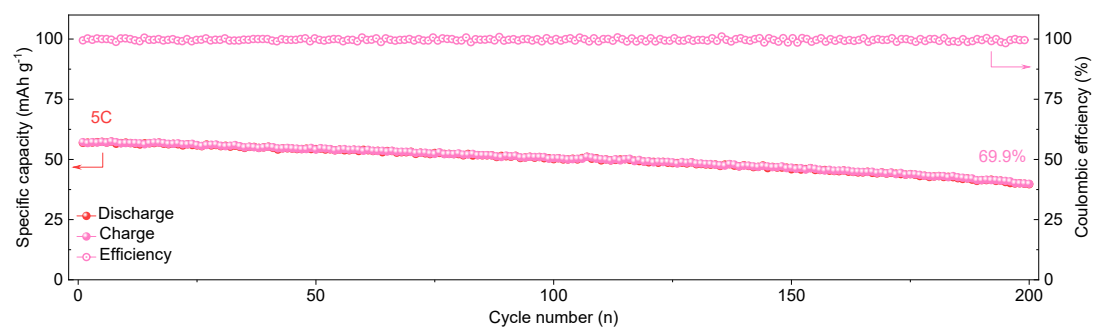

**Figure S6.** Cycling performance of NaMC-0.5 electrode during 200 cycles at 5C after various rates performance tests.

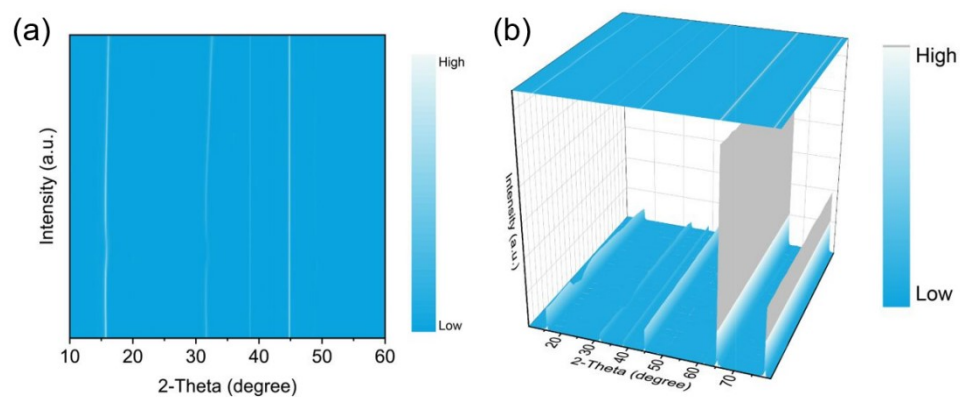

**Figure S7.** (a, b) The intensity contour maps (bird's eye view) and 3D counter graphs of NaMC-0.3 electrode during the first charge/discharge at 0.1 C in the voltage range of 2.0–4.0 V, respectively.

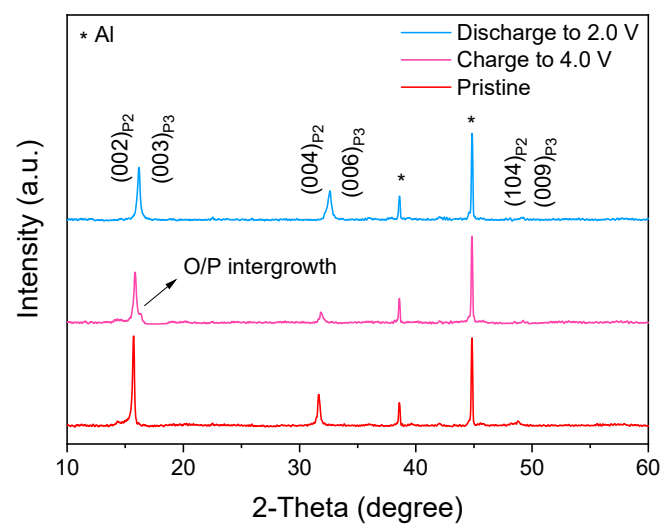

**Figure S8.** Detailed *in situ* XRD patterns of NaMC-0.3 electrode at different charge and discharge states.

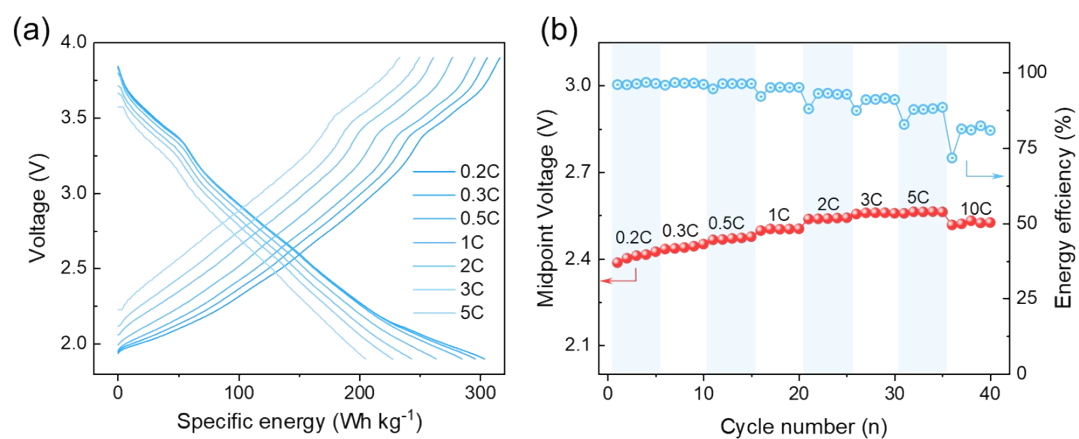

**Figure S9.** Rate performance for full-cell system. (a) Galvanostatic charge/discharge curves of NaMC-0.3 electrode versus specific energy at various rates in the voltage range of 1.9–3.9 V. (b) Corresponding Midpoint voltage as well as energy efficiency.

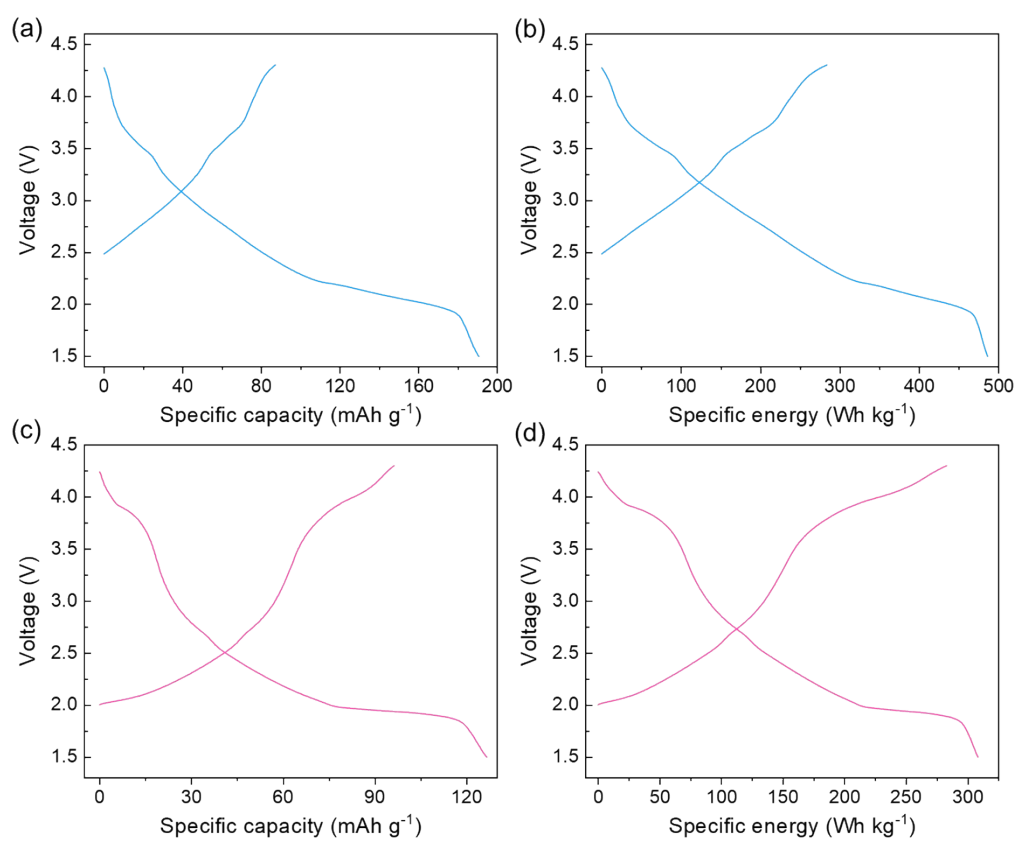

**Figure S10.** Initial galvanostatic charge/discharge curves for (a, b) NaMC-0.3 and (c, d) NaMC-0.5 electrodes in the voltage range of 1.5–4.3 V.

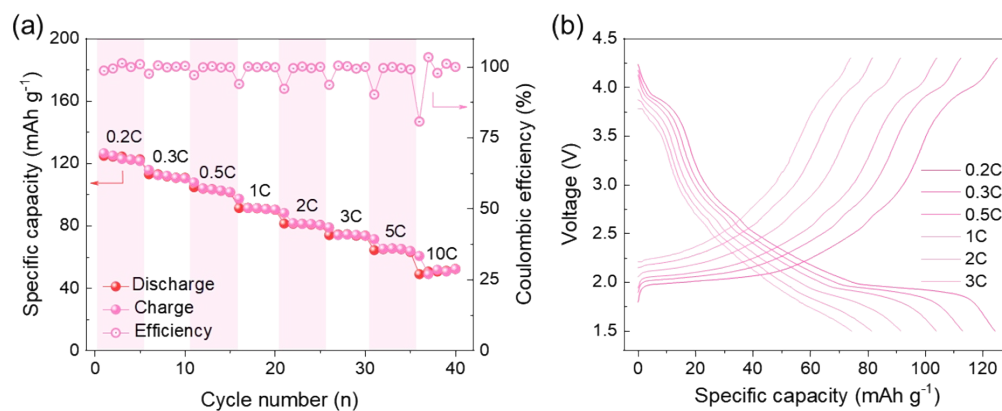

**Figure S11.** Electrochemical performance of NaMC-0.5 electrode in half-cell system within 1.5-4.3 V. (a, b) Rate performance and galvanostatic charge/discharge curves versus specific capacity at various rates, respectively.

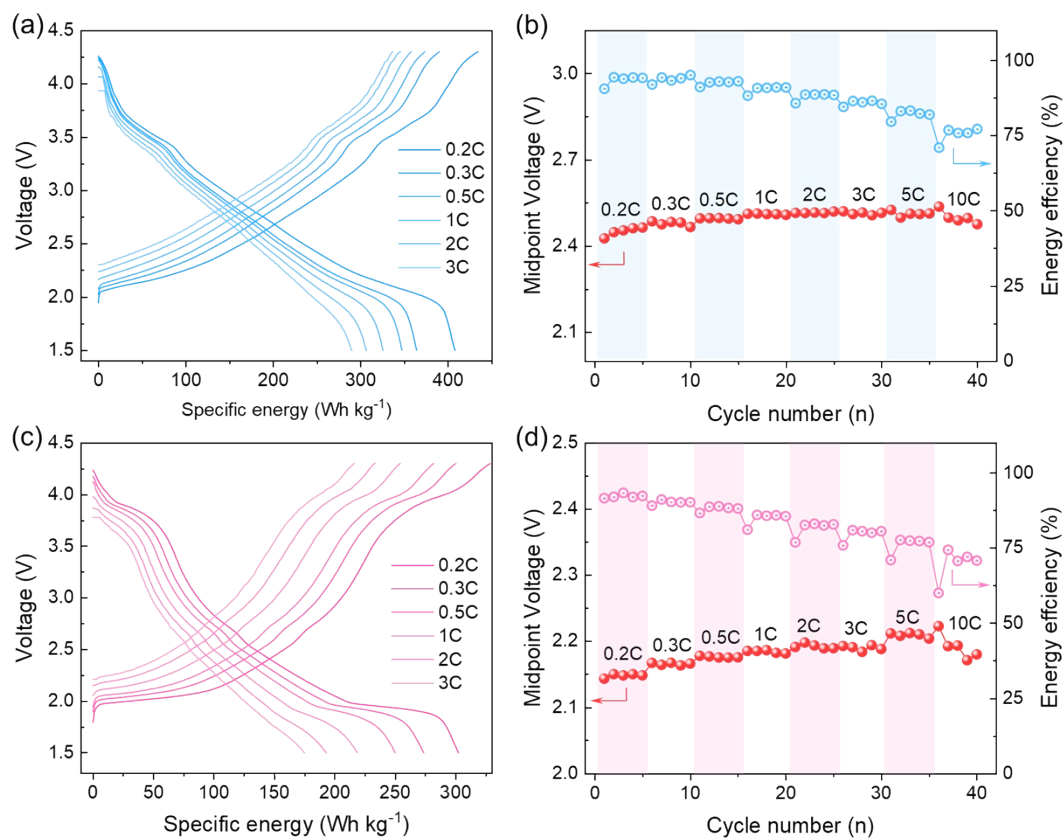

**Figure S12.** Rate performance for half-cell: Galvanostatic charge/discharge curves versus specific energy of (a) NaMC-0.3 and (c) NaMC-0.5 electrodes at various rates in the voltage range of 1.5-4.3 V, respectively. Corresponding midpoint voltage as well as energy efficiency of (b) NaMC-0.3 and (d) NaMC-0.5 electrodes.

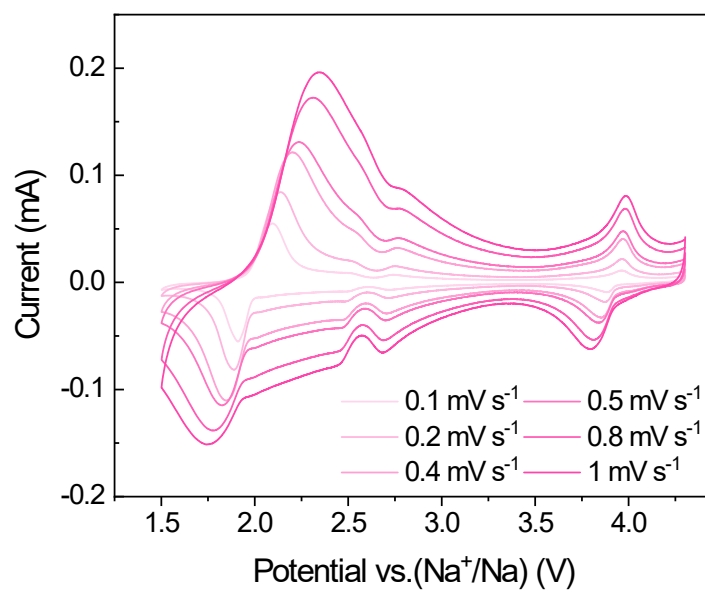

**Figure S13.** Cyclic voltammetry of NaMC-0.5 electrode at different scan rates.

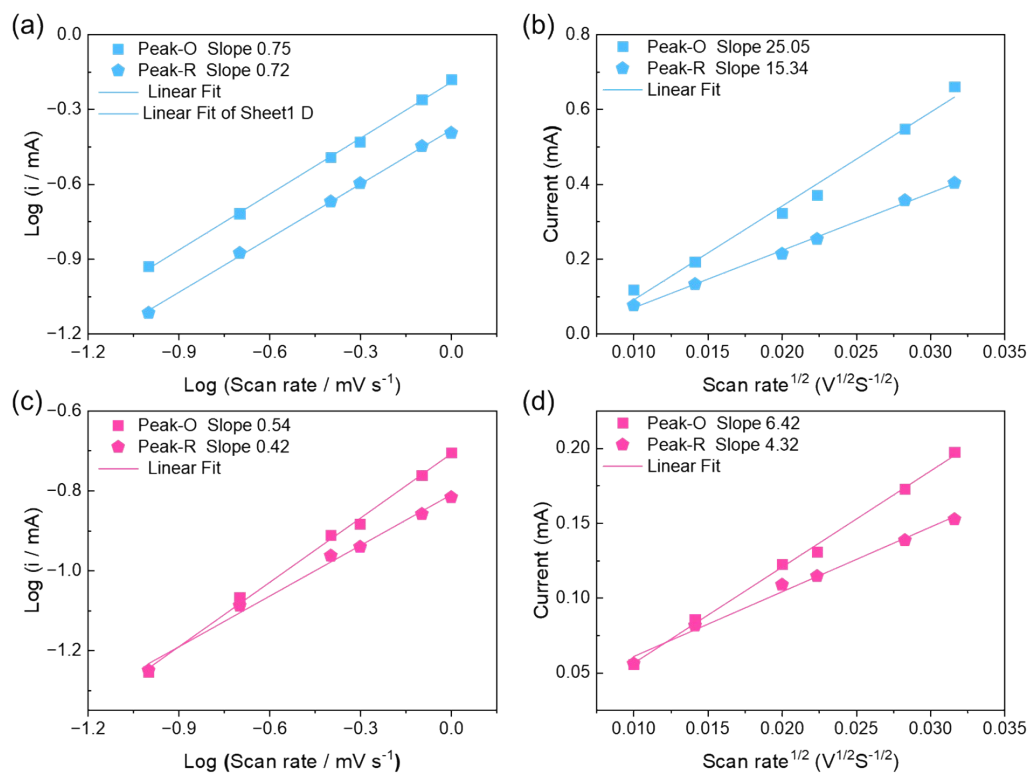

**Figure S14.** Linear fitting of log(*i*) versus log(*v*) plots and linear fitting of peak current versus square root of the scan rate of (a, b) NaMC-0.3, and (c, d). NaMC-0.5 electrodes, respectively.

**Table S1.** Summary of charge and discharge specific capacity (mAh g<sup>-1</sup>) at different rates for NaMC-0.3 and NaMC-0.5 electrodes in half-cell system within 2.0-4.0 V.

| Sample   | 0.2C            | 0.3C            | 0.5C            | 1C              | 2C              | 3C             | 5C            | 10C           |
|----------|-----------------|-----------------|-----------------|-----------------|-----------------|----------------|---------------|---------------|
| NaMC-0.3 | 146.6/<br>142.2 | 131.6/<br>129.4 | 124.7/<br>121.9 | 118.2/<br>112.5 | 110.2/<br>102.3 | 101.3/<br>95.6 | 96.4/<br>87.7 | 85.9/<br>76.6 |
| NaMC-0.5 | 71.2/<br>69.6   | 70.3/<br>69.3   | 66.0/<br>65.5   | 61.5/<br>60.9   | 61.2/<br>60.3   | 59.6/<br>58.7  | 57.6/<br>56.5 | 56.5/<br>53.9 |

**Table S2.** Summary of charge and discharge specific energy (Wh kg<sup>-1</sup>) at different rates for NaMC-0.3 and NaMC-0.5 electrodes in half-cell system within 2.0-4.0 V.

| Sample   | 0.2C            | 0.3C            | 0.5C            | 1C              | 2C              | 3C              | 5C              | 10C             |
|----------|-----------------|-----------------|-----------------|-----------------|-----------------|-----------------|-----------------|-----------------|
| NaMC-0.3 | 379.0/<br>369.8 | 352.0/<br>342.0 | 333.4/<br>324.5 | 314.8/<br>301.8 | 292.9/<br>276.4 | 279.2/<br>261.0 | 265.5/<br>244.5 | 246.6/<br>213.2 |
| NaMC-0.5 | 198.3/<br>188.3 | 195.2/<br>188.2 | 183/<br>177.4   | 170.8/<br>165.0 | 169.3/<br>162.9 | 166.0/<br>158.9 | 160.7/<br>153.2 | 154.6/<br>146.0 |

**Table S3.** Comparison of structural features, chemical composition, synthesis methods, and electrochemical performance of reported similar cathode materials in half-cell systems.

| Cathode materials                                                                                       | Synthesis methods      | Current density           | Discharge capacity                             | Rate performance   | Cycle performance    | Reference                                        |
|---------------------------------------------------------------------------------------------------------|------------------------|---------------------------|------------------------------------------------|--------------------|----------------------|--------------------------------------------------|
| P2/P3-<br>$\text{Na}_{0.44}\text{Mn}_{0.7}\text{Co}_{0.3}\text{O}_2$                                    | Thermal polymerization | 1C=120 mA g <sup>-1</sup> | 142.2 mAh g <sup>-1</sup><br>(0.2C, 2.0-4.0 V) | 65.7%<br>(5C/0.2C) | 84.7%<br>(200, 5C)   | <b>This work</b>                                 |
| P2/Tunnel-<br>$\text{Na}_{0.44}\text{Mn}_{0.9}\text{Co}_{0.1}\text{O}_2$                                | Thermal polymerization | 1C=120 mA g <sup>-1</sup> | 173.0 mAh g <sup>-1</sup><br>(0.2C, 2.0-4.0 V) | 62.0%<br>(5C/0.2C) | 82.0%<br>(100, 5C)   | Angew. Chem., Int. Ed.,<br>2020, 59, 1491-1495.  |
| P2-<br>$\text{Na}_{0.44}\text{Mn}_{0.99}\text{W}_{0.01}\text{O}_2$                                      | Solid-state reaction   | 1C=121 mA g <sup>-1</sup> | 180.0 mAh g <sup>-1</sup><br>(0.2C, 2.0-4.0 V) | 41.6%<br>(5C/0.2C) | 80.0%<br>(200, 5C)   | Adv. Energy Mater.,<br>2023, 13, 2203802.        |
| Tunnel-<br>$\text{Na}_{0.44}\text{Mn}_{0.95}\text{Mg}_{0.05}\text{O}_2$                                 | Solid-state reaction   | 1C=100 mA g <sup>-1</sup> | 105.0 mAh g <sup>-1</sup><br>(0.2C, 2.0-3.8 V) | 80.9%<br>(5C/0.2C) | 72.0%<br>(800, 5C)   | Adv. Sci.,<br>2021, 8, 2004448.                  |
| Tunnel-<br>$\text{Na}_{0.44}\text{Mn}_{0.98}\text{Zr}_{0.02}\text{O}_2$                                 | oxalic acid solution   | /                         | 112.0 mAh g <sup>-1</sup><br>(0.2C, 2.0-3.8 V) | 89.2%<br>(5C/0.2C) | 80%<br>(1000, 5C)    | ChemElectroChem,<br>2020, 7, 2545-2552.          |
| Tunnel-<br>$\text{Na}_{0.44}\text{Mn}_{0.97}\text{Al}_{0.01}\text{Ti}_{0.01}\text{Co}_{0.01}\text{O}_2$ | Solid-state reaction   | /                         | 136.0 mAh g <sup>-1</sup><br>(0.2C, 2.0-4.0 V) | 72.7%<br>(5C/0.2C) | 80%<br>(2000, 10C)   | Inorg. Chem. Front.,<br>2023, 10, 841-849.       |
| P2/Tunnel-<br>$\text{Na}_{0.44}\text{MnO}_{1.93}\text{F}_{0.07}$                                        | oxalic acid solution   | /                         | 165.0 mAh g <sup>-1</sup><br>(0.2C, 2.0-4.2 V) | 61.8%<br>(5C/0.2C) | 79%<br>(400, 5C)     | J. Power Sources,<br>2019, 427, 129-137.         |
| P2/Tunnel-<br>$\text{Na}_{0.44}\text{Mn}_{0.95}\text{Ni}_{0.05}\text{O}_2$                              | Solid-state reaction   | 1C=121 mA g <sup>-1</sup> | 112.0 mAh g <sup>-1</sup><br>(0.2C, 2.0-4.0 V) | 46.4%<br>(2C/0.2C) | 77.3%<br>(100, 0.3C) | J. Solid State Chem.,<br>2023, 318, 123741.      |
| P2-<br>$\text{Na}_{0.44}\text{Mn}_{0.89}\text{Ni}_{0.11}\text{O}_2$                                     | Thermal polymerization | 1C=120 mA g <sup>-1</sup> | 193.0 mAh g <sup>-1</sup><br>(0.1C, 2.0-4.2 V) | 47.0%<br>(5C/0.1C) | 74.0%<br>(100, 0.1C) | J. Solid State Electro.,<br>2019, 23, 2979-2988. |
| P2/Tunnel-<br>$\text{Na}_{0.44}\text{Mn}_{0.85}\text{Mg}_{0.11}\text{O}_2$                              | Thermal polymerization |                           | 188.0 mAh g <sup>-1</sup><br>(0.1C, 2.0-4.2 V) | 51.0%<br>(5C/0.1C) | 81.0%<br>(100, 0.1C) |                                                  |

**Table S4.** Summary of charge and discharge specific capacity (mAh g<sup>-1</sup>) at different rates for NaMC-0.3 and NaMC-0.5 electrodes in half-cell system within 1.5-4.3 V.

| Sample   | 0.2C            | 0.3C            | 0.5C            | 1C              | 2C              | 3C              | 5C              | 10C            |
|----------|-----------------|-----------------|-----------------|-----------------|-----------------|-----------------|-----------------|----------------|
| NaMC-0.3 | 168.7/<br>159.6 | 146.7/<br>142.6 | 138.0/<br>134.6 | 130.0/<br>125.5 | 122.1/<br>118.1 | 116.7/<br>113.5 | 111.0/<br>105.2 | 104.5/<br>95.0 |
| NaMC-0.5 | 126.5/<br>124.8 | 115.8/<br>113.0 | 107.8/<br>104.7 | 97.3/<br>91.4   | 88.2/<br>81.4   | 79.0/<br>74.0   | 71.4/<br>64.4   | 60.7/<br>49.0  |

**Table S5.** Summary of charge and discharge specific energy (Wh kg<sup>-1</sup>) at different rates for NaMC-0.3 and NaMC-0.5 electrodes in half-cell system within 1.5-4.3 V.

| Sample   | 0.2C            | 0.3C            | 0.5C            | 1C              | 2C              | 3C              | 5C              | 10C             |
|----------|-----------------|-----------------|-----------------|-----------------|-----------------|-----------------|-----------------|-----------------|
| NaMC-0.3 | 434.2/<br>407.9 | 390.0/<br>364.1 | 373.5/<br>347.3 | 358.2/<br>325.6 | 345.5/<br>306.5 | 336.7/<br>290.0 | 324.8/<br>270.6 | 301.8/<br>229.0 |
| NaMC-0.5 | 328.7/<br>302.5 | 300.3/<br>273.7 | 281.9/<br>250.1 | 254.2/<br>218.7 | 233.5/<br>193.0 | 216.3/<br>175.1 | 196.8/<br>152.9 | 154.9/<br>115.3 |
